# Supplementary material for: A Gene Gravity Model for the Evolution of Cancer Genomes: A Study of 3,000 Cancer Genomes across 9 Cancer Types
Source: PubMed Central journal article supplement (PMC4564226; doi:10.1371/journal.pcbi.1004497), 2015-09-09
Supplement: pcbi.1004497.s001.pdf [file pcbi.1004497.s001.pdf]

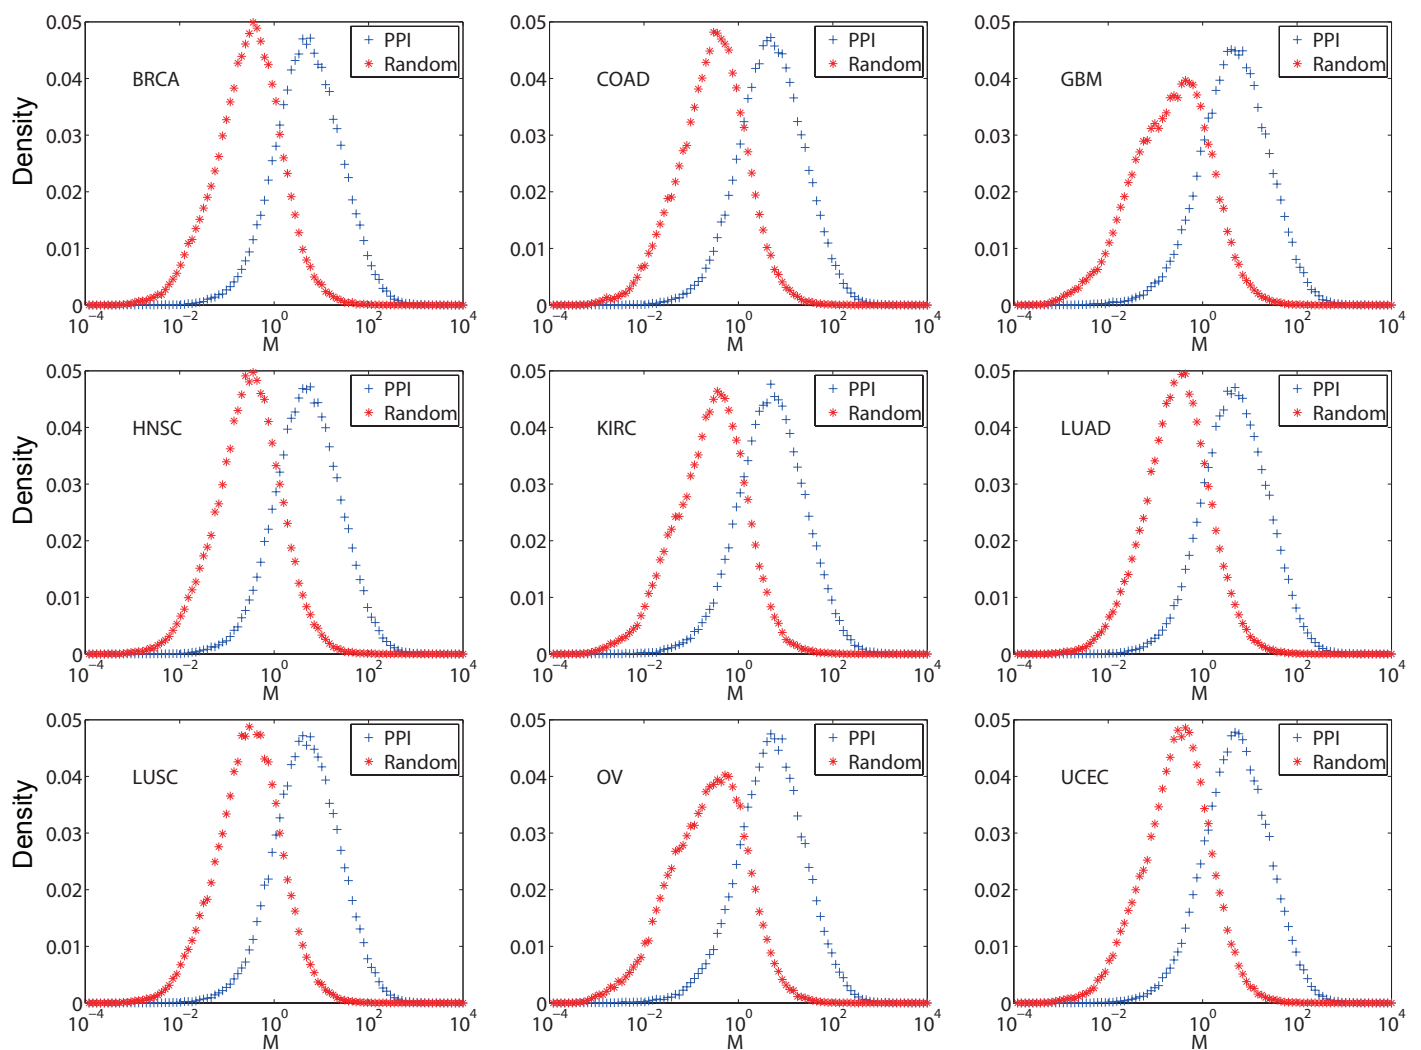

**Fig. S1.** The distribution of mutational signal ( $M=M1 \times M2$ , see the section of Methods and Materials) values of the protein-protein interaction (PPI) pairs in the protein interaction network in comparison to the unfiltered interactions relative to the same number of random pairs across 9 cancer types. We found that PIN is significantly more enriched for high mutation rates than random pairs across 9 cancer types ( $q < 2.2 \times 10^{-16}$ , Wilcoxon sum-rank test adjusted by R-package multiple test. BRCA: breast invasive carcinoma, COAD: colon adenocarcinoma, GBM: glioblastoma multiforme, HNSC: head and neck squamous cell carcinoma, KIRC: kidney renal clear cell carcinoma, LUAD: lung adenocarcinoma, LUSC: lung squamous cell carcinoma, OV: ovarian serous cystadenocarcinoma, and UCEC: uterine corpus endometrial carcinoma.
