# Supplementary material for: A Gene Gravity Model for the Evolution of Cancer Genomes: A Study of 3,000 Cancer Genomes across 9 Cancer Types
Source: PubMed Central journal article supplement (PMC4564226; doi:10.1371/journal.pcbi.1004497), 2015-09-09
Supplement: pcbi.1004497.s007.pdf [file pcbi.1004497.s007.pdf]

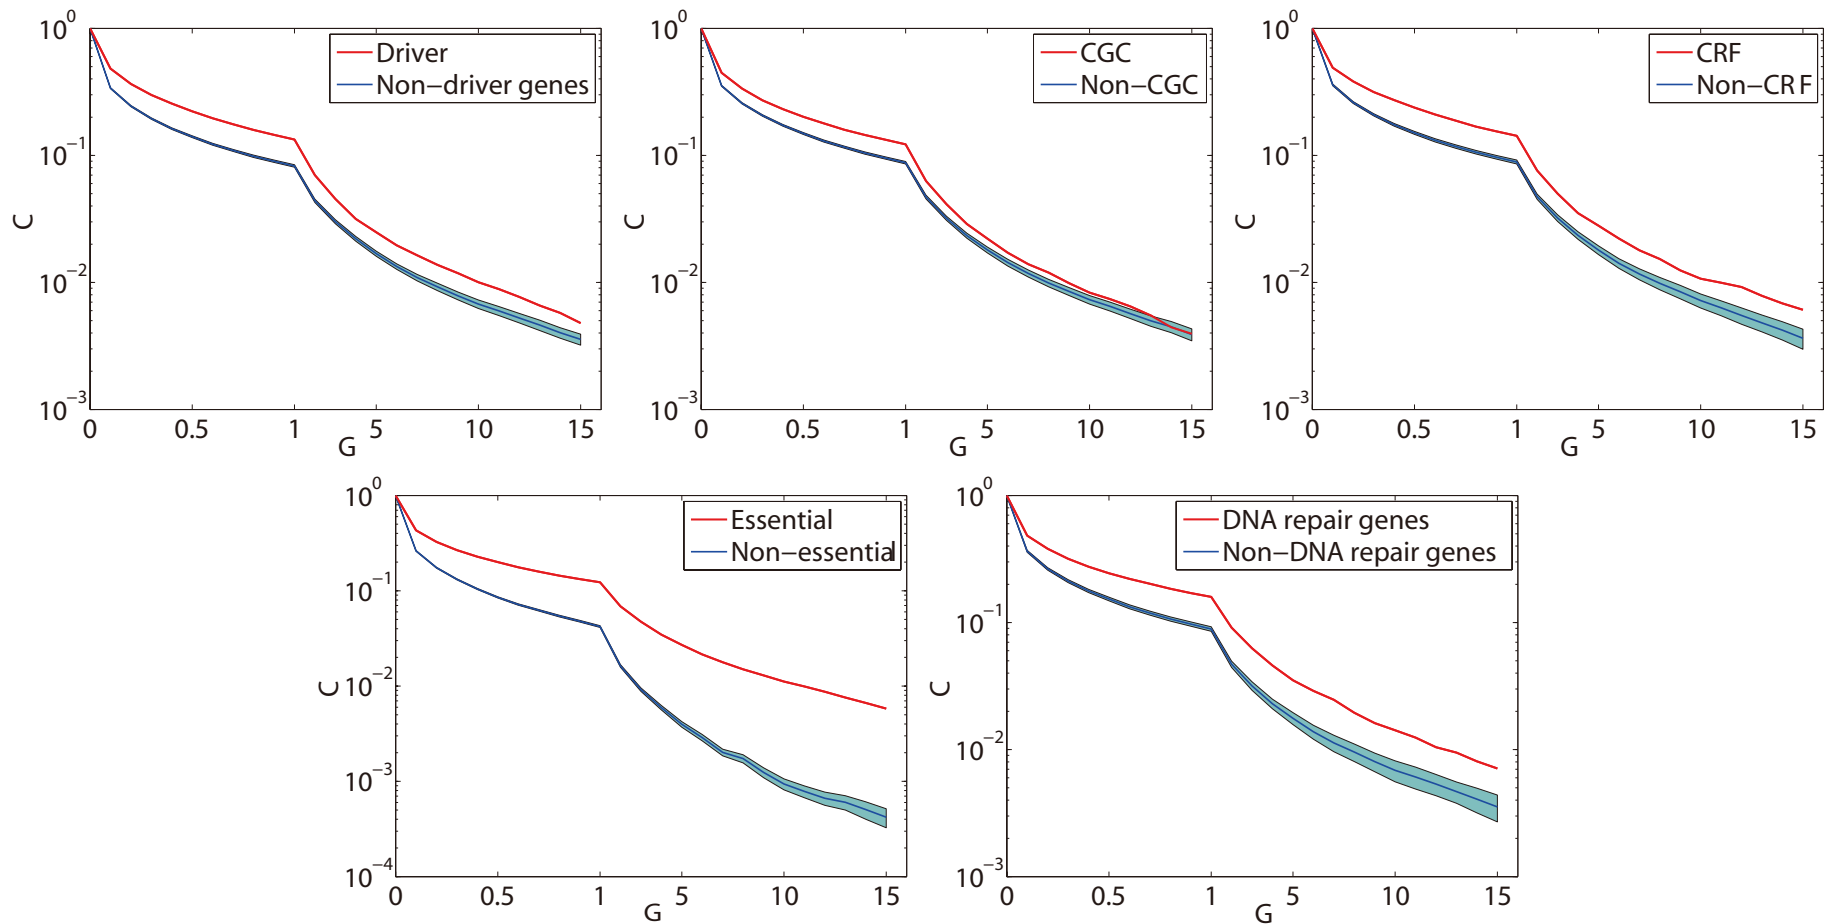

**Fig. S7.** The complementary cumulative distribution ( $C$ ) of the gene-gene gravitation score ( $G$ ) for five different gene sets: cancer driver gene (Driver), Cancer Gene Census (CGC), chromatin regulation factors (CRF), essential genes, and DNA repair genes in lung adenocarcinoma (LUAD). The number of gene-gene pairs for blue line is equal to red line by random sampling 100 times. The shadow of blue line represent the standard deviation.
