# Supplementary material for: A Gene Gravity Model for the Evolution of Cancer Genomes: A Study of 3,000 Cancer Genomes across 9 Cancer Types
Source: PubMed Central journal article supplement (PMC4564226; doi:10.1371/journal.pcbi.1004497), 2015-09-09
Supplement: pcbi.1004497.s011.pdf [file pcbi.1004497.s011.pdf]

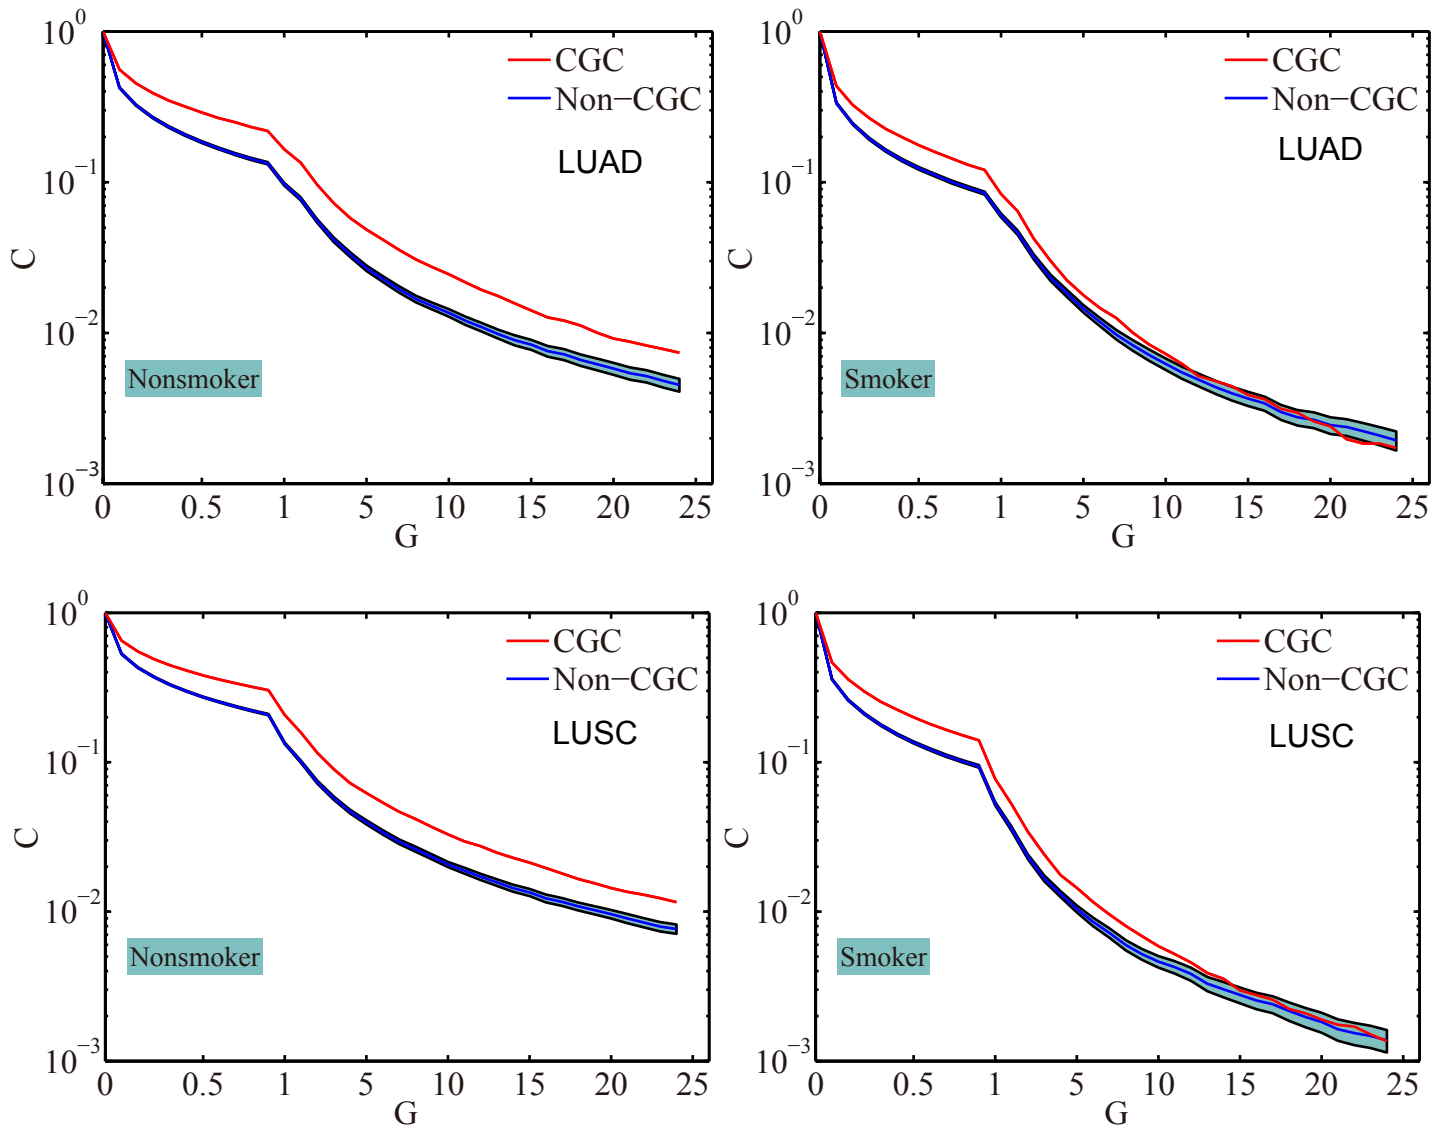

**Fig. S11.** The complementary cumulative distribution ( $C$ ) of the gene-gene gravitation score ( $G$ ) for Cancer Gene Census (CGC) genes in lung adenocarcinoma (LUAD) and lung squamous cell carcinoma (LUSC) smoker and never-smoker (Nonsmoker) patients. The number of gene-gene pairs for blue line is equal to red line by random sampling 100 times. The shadow of blue line represent the standard deviation.
