# Supplementary material for: A Gene Gravity Model for the Evolution of Cancer Genomes: A Study of 3,000 Cancer Genomes across 9 Cancer Types
Source: PubMed Central journal article supplement (PMC4564226; doi:10.1371/journal.pcbi.1004497), 2015-09-09
Supplement: pcbi.1004497.s024.pdf [file pcbi.1004497.s024.pdf]

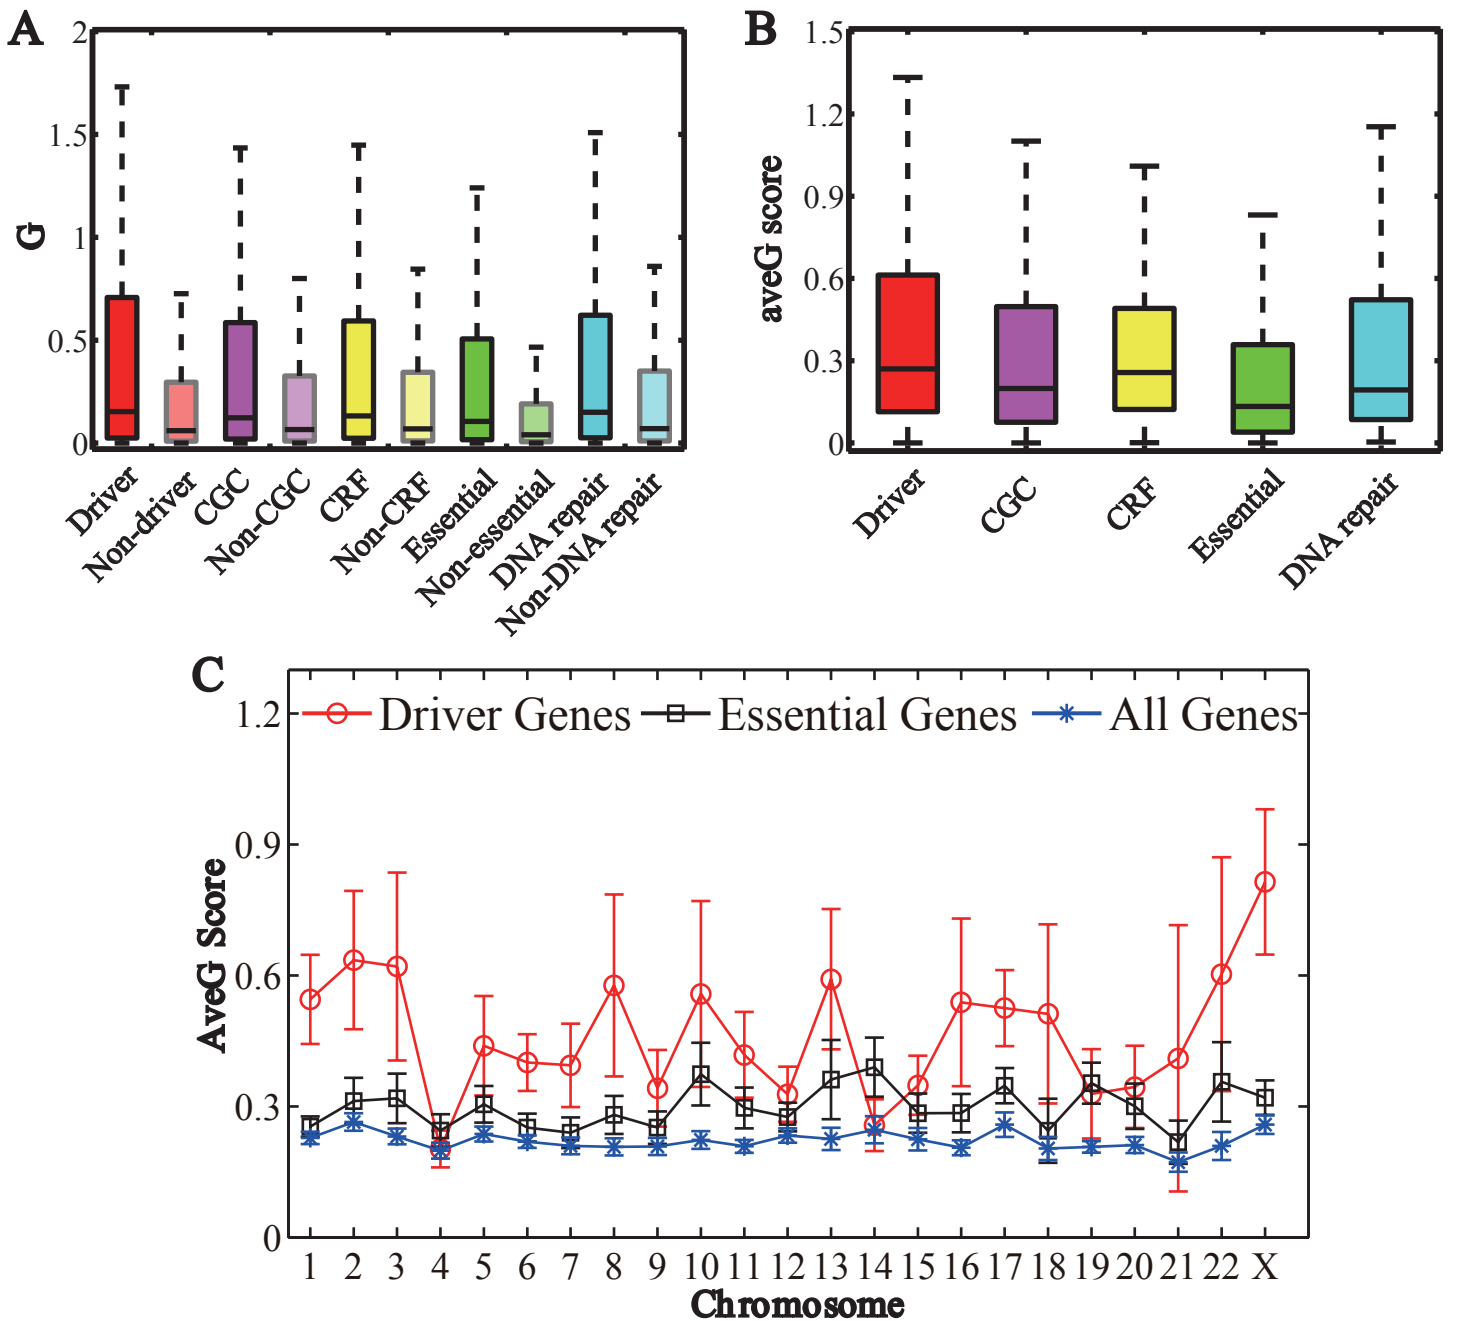

**Fig. S24.** The performance of the gene gravity model after removing 18 ultramutated tumor samples in uterine corpus endometrial carcinoma (UCEC). **(A)** Box plots of gene-gene gravitation score (G) distribution for five gene sets in UCEC. Red: Cancer driver genes (driver) versus non-cancer driver genes (non-driver); purple: Cancer Gene Census (CGC) genes versus non-CGC genes; yellow: Chromatin regulation factors (CRFs) versus non-CRFs; green: Essential genes (Essential) versus non-essential genes (non-essential); blue: DNA repair genes versus non-DNA repair genes. **(B)** Box plots of gene average gravitation (aveG) score for five gene sets in UCEC. **(C)** Distribution of average gravitation (aveG) score for cancer driver genes, essential genes, and all genes across 23 human chromosomes in UCEC.
