# Supplementary material for: A Gene Gravity Model for the Evolution of Cancer Genomes: A Study of 3,000 Cancer Genomes across 9 Cancer Types
Source: PubMed Central journal article supplement (PMC4564226; doi:10.1371/journal.pcbi.1004497), 2015-09-09
Supplement: pcbi.1004497.s027.pdf [file pcbi.1004497.s027.pdf]

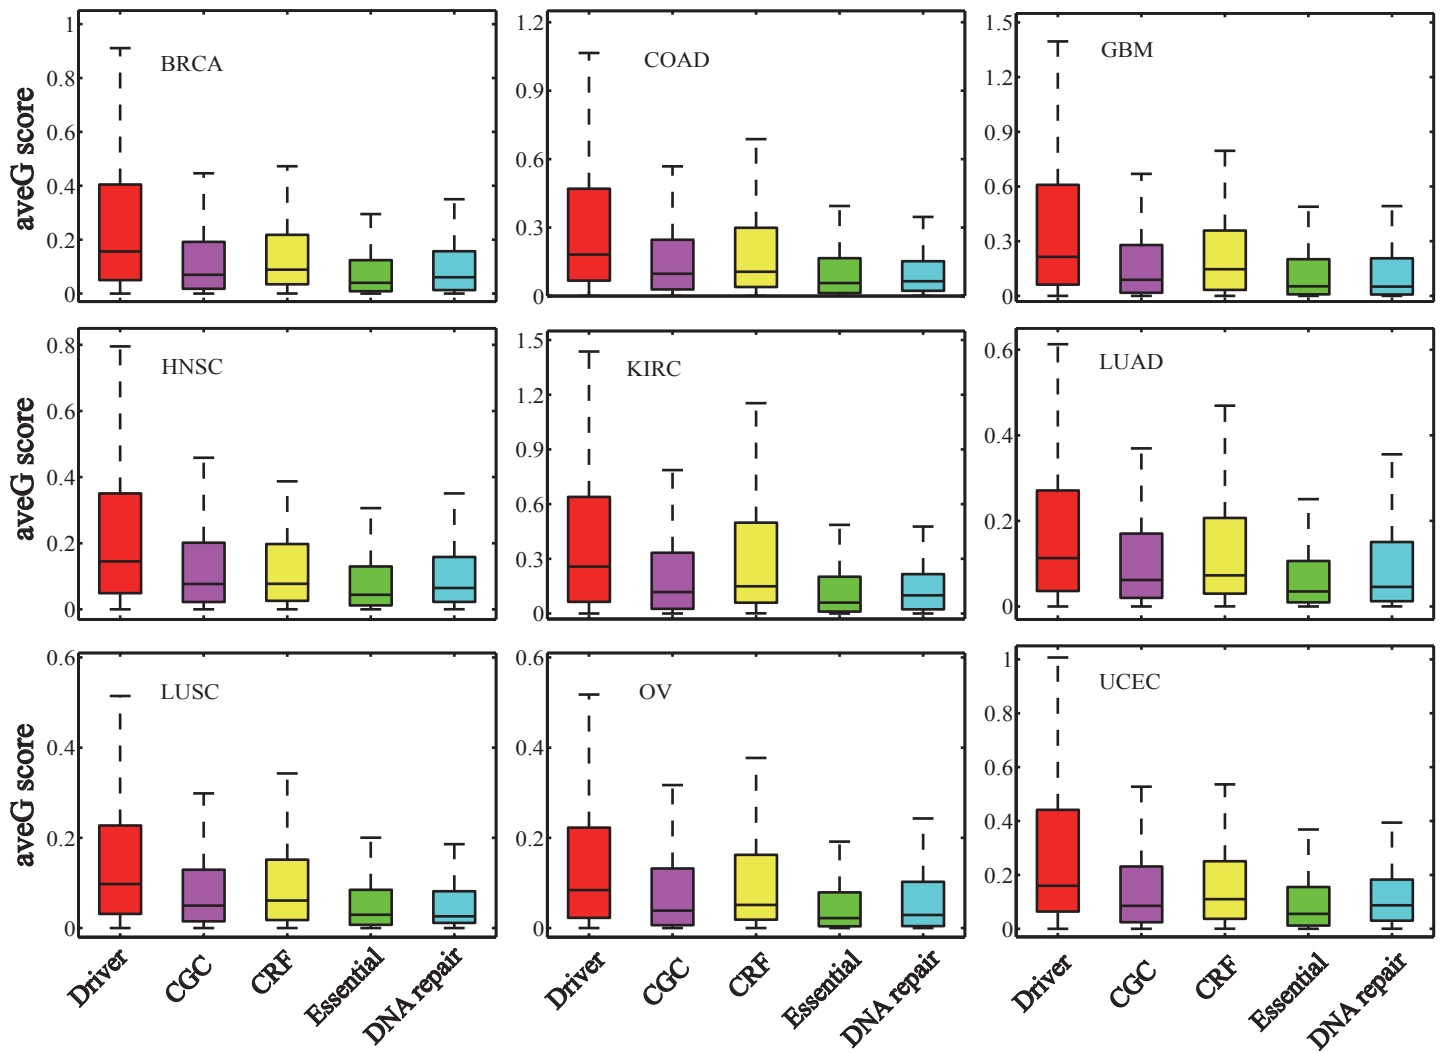

**Fig. S27.** Box plots of gene average gravitation (aveG) score for five gene sets across 9 cancer types when set up  $\alpha = 0.2$  during mutation network propagation. Red: Cancer driver genes (Driver); purple: Cancer Gene Census (CGC) genes; yellow: Chromatin regulation factors (CRF); green: Essential genes (Essential); and blue: DNA repair genes.
