# Supplementary material for: A Gene Gravity Model for the Evolution of Cancer Genomes: A Study of 3,000 Cancer Genomes across 9 Cancer Types
Source: PubMed Central journal article supplement (PMC4564226; doi:10.1371/journal.pcbi.1004497), 2015-09-09
Supplement: pcbi.1004497.s028.pdf [file pcbi.1004497.s028.pdf]

**S1 Table.** The statistics of transcriptional (RNA-seq) and somatic mutation profiles across 9 cancer types used in this study.

| Cancer type | The number of samples (RNA-seq) | The number of samples (somatic mutations) | The number of somatic mutations |
|-------------|---------------------------------|-------------------------------------------|---------------------------------|
| BRCA        | 988                             | 771                                       | 31,408                          |
| LUAD        | 468                             | 227                                       | 55,705                          |
| LUSC        | 482                             | 177                                       | 43,898                          |
| KIRC        | 480                             | 417                                       | 20,102                          |
| HNSC        | 303                             | 305                                       | 39,714                          |
| COADREAD    | 232                             | 213                                       | 28,012                          |
| UCEC        | 118                             | 228                                       | 29,585                          |
| OV          | 262                             | 316                                       | 13,815                          |
| GBM         | 154                             | 291                                       | 15,131                          |
| Total       | 3,487                           | 2,946                                     | 277,370                         |

Abbreviations: LUAD: Lung adenocarcinoma, LUSC: lung squamous cell carcinoma, BRCA: breast adenocarcinoma, UCEC: uterine corpus endometrial carcinoma, COAD: colon and rectal carcinoma cancer, OV: ovarian serous carcinoma, GBM: glioblastoma multiforme, KIRC: kidney renal clear cell carcinoma, and HNSC: head and neck cancer.
