# Supplementary material for: A Gene Gravity Model for the Evolution of Cancer Genomes: A Study of 3,000 Cancer Genomes across 9 Cancer Types
Source: PubMed Central journal article supplement (PMC4564226; doi:10.1371/journal.pcbi.1004497), 2015-09-09
Supplement: pcbi.1004497.s032.pdf [file pcbi.1004497.s032.pdf]

**S5 Table.** The average gravitation score of CRF cancer driver genes, non-CRF cancer driver genes and non-driver CRF genes.

| Cancer type | Average gravitation score $\pm$ standard deviation |                             |                      | Adjusted p-value ( <i>q</i> ) |                               |            |
|-------------|----------------------------------------------------|-----------------------------|----------------------|-------------------------------|-------------------------------|------------|
|             | CRF cancer driver genes                            | Non-CRF cancer driver genes | Non-driver CRF genes | <b>I</b>                      | <b>II</b>                     | <b>III</b> |
| BRCA        | 0.60 $\pm$ 0.10                                    | 0.46 $\pm$ 0.02             | 0.38 $\pm$ 0.05      | 0.18                          | 0.06                          | 1.0        |
| COAD        | 0.77 $\pm$ 0.13                                    | 0.63 $\pm$ 0.04             | 0.50 $\pm$ 0.05      | 0.18                          | 0.08                          | 1.0        |
| GBM         | 1.1 $\pm$ 0.17                                     | 0.80 $\pm$ 0.05             | 0.73 $\pm$ 0.08      | 0.08                          | 0.06                          | 1.0        |
| HNSC        | 0.64 $\pm$ 0.12                                    | 0.44 $\pm$ 0.02             | 0.36 $\pm$ 0.04      | 0.16                          | 0.06                          | 1.0        |
| KIRC        | 1.6 $\pm$ 0.48                                     | 0.76 $\pm$ 0.04             | 0.72 $\pm$ 0.09      | 4.2 $\times$ 10 <sup>-3</sup> | 3.3 $\times$ 10 <sup>-3</sup> | 1.0        |
| LUAD        | 0.52 $\pm$ 0.07                                    | 0.41 $\pm$ 0.02             | 0.41 $\pm$ 0.04      | 0.08                          | 0.08                          | 1.0        |
| LUSC        | 0.42 $\pm$ 0.06                                    | 0.32 $\pm$ 0.02             | 0.27 $\pm$ 0.03      | 0.10                          | 0.04                          | 1.0        |
| OV          | 0.44 $\pm$ 0.08                                    | 0.29 $\pm$ 0.02             | 0.26 $\pm$ 0.02      | 0.08                          | 0.08                          | 1.0        |
| UCEC        | 0.79 $\pm$ 0.21                                    | 0.56 $\pm$ 0.03             | 0.45 $\pm$ 0.05      | 0.18                          | 0.08                          | 1.0        |

The p-values in column **I** represent the Wilcoxon rank-sum test of average gravitation score between CRF cancer driver genes versus non-CRF cancer driver genes. The p-values in column **II** represent the Wilcoxon rank-sum test of average gravitation score between CRF cancer driver genes versus non-driver CRF genes. The p-values in column **III** represent the Wilcoxon rank-sum test of average gravitation score between non-CRF cancer driver genes and non-driver CRF genes. CRF: chromatin regulation factor. All p-values were corrected by Benjamini-Hochberg multiple testing in **S5-S12 Tables**.
