# Supplementary material for: A Gene Gravity Model for the Evolution of Cancer Genomes: A Study of 3,000 Cancer Genomes across 9 Cancer Types
Source: PubMed Central journal article supplement (PMC4564226; doi:10.1371/journal.pcbi.1004497), 2015-09-09
Supplement: pcbi.1004497.s033.pdf [file pcbi.1004497.s033.pdf]

**S6 Table.** The average gravitation score of CRF CGC genes, non-CRF CGC genes and non-CGC CRF genes.

| Cancer type | Average gravitation score $\pm$ standard deviation |                   |                   | Adjusted p-value ( <i>q</i> ) |                      |            |
|-------------|----------------------------------------------------|-------------------|-------------------|-------------------------------|----------------------|------------|
|             | CRF CGC genes                                      | Non-CRF CGC genes | Non-CGC CRF genes | <b>I</b>                      | <b>II</b>            | <b>III</b> |
| BRCA        | 0.57 $\pm$ 0.13                                    | 0.33 $\pm$ 0.02   | 0.39 $\pm$ 0.04   | 0.03                          | 0.46                 | 0.08       |
| COAD        | 0.70 $\pm$ 0.15                                    | 0.44 $\pm$ 0.03   | 0.52 $\pm$ 0.05   | 0.04                          | 0.48                 | 0.17       |
| GBM         | 1.1 $\pm$ 0.20                                     | 0.58 $\pm$ 0.04   | 0.76 $\pm$ 0.08   | 7.0 $\times 10^{-4}$          | 0.13                 | 0.06       |
| HNSC        | 0.65 $\pm$ 0.16                                    | 0.34 $\pm$ 0.02   | 0.37 $\pm$ 0.04   | 0.04                          | 0.46                 | 0.17       |
| KIRC        | 1.9 $\pm$ 0.64                                     | 0.53 $\pm$ 0.04   | 0.74 $\pm$ 0.08   | 6.8 $\times 10^{-6}$          | 6.2 $\times 10^{-3}$ | 0.04       |
| LUAD        | 0.56 $\pm$ 0.10                                    | 0.30 $\pm$ 0.02   | 0.41 $\pm$ 0.04   | 0.08                          | 0.24                 | 0.06       |
| LUSC        | 0.39 $\pm$ 0.07                                    | 0.23 $\pm$ 0.02   | 0.29 $\pm$ 0.03   | 0.03                          | 0.46                 | 0.09       |
| OV          | 0.36 $\pm$ 0.06                                    | 0.22 $\pm$ 0.01   | 0.29 $\pm$ 0.03   | 0.02                          | 0.46                 | 0.04       |
| UCEC        | 0.82 $\pm$ 0.28                                    | 0.42 $\pm$ 0.03   | 0.47 $\pm$ 0.05   | 0.04                          | 0.46                 | 0.06       |

The p-values in column **I** represent the Wilcoxon rank-sum test of average gravitation score between CRF CGC genes versus non-CRF CGC genes. The p-values in column **II** represent the Wilcoxon rank-sum test of average gravitation score between CRF CGC genes versus non-CGC CRF genes. The p-values in column **III** represent the Wilcoxon rank-sum test of average gravitation score between non-CRF CGC genes and non-CGC CRF genes. CRF: chromatin regulation factor, CGC: cancer gene census.
