# Supplementary material for: A Gene Gravity Model for the Evolution of Cancer Genomes: A Study of 3,000 Cancer Genomes across 9 Cancer Types
Source: PubMed Central journal article supplement (PMC4564226; doi:10.1371/journal.pcbi.1004497), 2015-09-09
Supplement: pcbi.1004497.s034.pdf [file pcbi.1004497.s034.pdf]

**S7 Table.** The average gravitation score of DNA repair cancer driver genes, non-DNA repair cancer driver genes, and non-driver DNA repair genes.

| Cancer type | Average gravitation score $\pm$ standard deviation |                                    |                             | Adjusted p-value ( <i>q</i> ) |                               |                               |
|-------------|----------------------------------------------------|------------------------------------|-----------------------------|-------------------------------|-------------------------------|-------------------------------|
|             | DNA repair cancer driver genes                     | Non-DNA repair cancer driver genes | Non-driver DNA repair genes | <b>I</b>                      | <b>II</b>                     | <b>III</b>                    |
| BRCA        | 0.73 $\pm$ 0.13                                    | 0.46 $\pm$ 0.02                    | 0.24 $\pm$ 0.03             | 0.12                          | 4.4 $\times$ 10 <sup>-4</sup> | 3.8 $\times$ 10 <sup>-6</sup> |
| COAD        | 0.67 $\pm$ 0.11                                    | 0.64 $\pm$ 0.04                    | 0.31 $\pm$ 0.04             | 0.15                          | 3.2 $\times$ 10 <sup>-4</sup> | 3.0 $\times$ 10 <sup>-7</sup> |
| GBM         | 1.2 $\pm$ 0.33                                     | 0.81 $\pm$ 0.05                    | 0.43 $\pm$ 0.07             | 0.15                          | 4.4 $\times$ 10 <sup>-4</sup> | 1.5 $\times$ 10 <sup>-7</sup> |
| HNSC        | 0.44 $\pm$ 0.17                                    | 0.45 $\pm$ 0.02                    | 0.25 $\pm$ 0.03             | 0.02                          | 9.9 $\times$ 10 <sup>-5</sup> | 6.9 $\times$ 10 <sup>-6</sup> |
| KIRC        | 1.2 $\pm$ 0.23                                     | 0.80 $\pm$ 0.05                    | 0.38 $\pm$ 0.04             | 0.08                          | 2.7 $\times$ 10 <sup>-4</sup> | 1.8 $\times$ 10 <sup>-6</sup> |
| LUAD        | 0.68 $\pm$ 0.13                                    | 0.41 $\pm$ 0.02                    | 0.28 $\pm$ 0.04             | 0.08                          | 5.2 $\times$ 10 <sup>-4</sup> | 1.7 $\times$ 10 <sup>-4</sup> |
| LUSC        | 0.41 $\pm$ 0.08                                    | 0.33 $\pm$ 0.02                    | 0.18 $\pm$ 0.03             | 0.15                          | 4.4 $\times$ 10 <sup>-4</sup> | 3.0 $\times$ 10 <sup>-7</sup> |
| OV          | 0.43 $\pm$ 0.09                                    | 0.30 $\pm$ 0.02                    | 0.15 $\pm$ 0.02             | 0.12                          | 3.2 $\times$ 10 <sup>-4</sup> | 3.0 $\times$ 10 <sup>-7</sup> |
| UCEC        | 0.70 $\pm$ 0.11                                    | 0.57 $\pm$ 0.03                    | 0.34 $\pm$ 0.04             | 0.12                          | 5.2 $\times$ 10 <sup>-4</sup> | 5.5 $\times$ 10 <sup>-4</sup> |

The p-values in column **I** represent the Wilcoxon rank-sum test of average gravitation score between DNA repair cancer driver genes and non-DNA repair cancer driver genes. The p-values in column **II** represent the Wilcoxon rank-sum test of average gravitation score between DNA repair cancer driver genes and non-driver DNA repair genes. The p-values in **III** represent the Wilcoxon rank-sum test of average gravitation score between non-DNA repair cancer driver genes and non-driver DNA repair genes.
