# Supplementary material for: A Gene Gravity Model for the Evolution of Cancer Genomes: A Study of 3,000 Cancer Genomes across 9 Cancer Types
Source: PubMed Central journal article supplement (PMC4564226; doi:10.1371/journal.pcbi.1004497), 2015-09-09
Supplement: pcbi.1004497.s035.pdf [file pcbi.1004497.s035.pdf]

**S8 Table.** The average gravitation score of DNA repair Cancer Gene Census (CGC) genes, non-DNA repair CGC genes, and non-CGC DNA repair genes.

| Cancer type | Average gravitation score $\pm$ standard deviation |                          |                          | Adjusted p-value ( <i>q</i> ) |           |            |
|-------------|----------------------------------------------------|--------------------------|--------------------------|-------------------------------|-----------|------------|
|             | DNA repair CGC genes                               | Non-DNA repair CGC genes | Non-CGC DNA repair genes | <b>I</b>                      | <b>II</b> | <b>III</b> |
| BRCA        | 0.50 $\pm$ 0.10                                    | 0.34 $\pm$ 0.02          | 0.25 $\pm$ 0.03          | 0.68                          | 0.12      | 0.20       |
| COAD        | 0.46 $\pm$ 0.08                                    | 0.46 $\pm$ 0.03          | 0.32 $\pm$ 0.05          | 0.91                          | 0.12      | 0.04       |
| GBM         | 0.64 $\pm$ 0.12                                    | 0.61 $\pm$ 0.04          | 0.48 $\pm$ 0.09          | 0.91                          | 0.12      | 0.09       |
| HNSC        | 0.50 $\pm$ 0.12                                    | 0.35 $\pm$ 0.02          | 0.27 $\pm$ 0.04          | 0.91                          | 0.25      | 0.17       |
| KIRC        | 0.75 $\pm$ 0.16                                    | 0.60 $\pm$ 0.06          | 0.41 $\pm$ 0.05          | 0.91                          | 0.12      | 0.16       |
| LUAD        | 0.44 $\pm$ 0.08                                    | 0.31 $\pm$ 0.02          | 0.29 $\pm$ 0.04          | 0.68                          | 0.12      | 0.19       |
| LUSC        | 0.25 $\pm$ 0.05                                    | 0.24 $\pm$ 0.02          | 0.19 $\pm$ 0.03          | 0.91                          | 0.12      | 0.11       |
| OV          | 0.30 $\pm$ 0.06                                    | 0.22 $\pm$ 0.01          | 0.15 $\pm$ 0.02          | 0.77                          | 0.03      | 0.02       |
| UCEC        | 0.45 $\pm$ 0.07                                    | 0.45 $\pm$ 0.04          | 0.36 $\pm$ 0.04          | 0.68                          | 0.12      | 0.64       |

The p-values in column **I** represent the Wilcoxon rank-sum test of average gravitation score between DNA repair CGC genes and non-DNA repair CGC genes. The p-values in column **II** represent the Wilcoxon rank-sum test of average gravitation score between DNA repair CGC genes and non-CGC DNA repair genes. The p-values in **III** represent the Wilcoxon rank-sum test of average gravitation score between non-DNA repair CGC genes and non-CGC DNA repair genes.
