# Supplementary material for: A Gene Gravity Model for the Evolution of Cancer Genomes: A Study of 3,000 Cancer Genomes across 9 Cancer Types
Source: PubMed Central journal article supplement (PMC4564226; doi:10.1371/journal.pcbi.1004497), 2015-09-09
Supplement: pcbi.1004497.s036.pdf [file pcbi.1004497.s036.pdf]

**S9 Table.** The enrichment analysis of the top 100 genes that have the highest gene average gravitation score between cancer driver genes and non-driver genes.

| Cancer type | Number of driver genes | Number of non-driver genes | Adjusted p-value ( <i>q</i> ) | Odd ratio | Number of all driver genes | Number of all non-driver genes |
|-------------|------------------------|----------------------------|-------------------------------|-----------|----------------------------|--------------------------------|
| BRCA        | 16                     | 84                         | $1.8 \times 10^{-7}$          | 6.3       |                            |                                |
| COAD        | 21                     | 79                         | $1.2 \times 10^{-11}$         | 8.9       |                            |                                |
| GBM         | 15                     | 85                         | $2.9 \times 10^{-7}$          | 5.8       |                            |                                |
| HNSC        | 17                     | 83                         | $3.4 \times 10^{-8}$          | 6.8       |                            |                                |
| KIRC        | 22                     | 78                         | $1.6 \times 10^{-12}$         | 9.4       | 614                        | 19852                          |
| LUAD        | 18                     | 82                         | $5.6 \times 10^{-9}$          | 7.3       |                            |                                |
| LUSC        | 16                     | 84                         | $1.8 \times 10^{-7}$          | 6.3       |                            |                                |
| OV          | 16                     | 84                         | $1.8 \times 10^{-7}$          | 6.3       |                            |                                |
| UCEC        | 22                     | 78                         | $1.6 \times 10^{-12}$         | 9.4       |                            |                                |
