# Supplementary material for: A Gene Gravity Model for the Evolution of Cancer Genomes: A Study of 3,000 Cancer Genomes across 9 Cancer Types
Source: PubMed Central journal article supplement (PMC4564226; doi:10.1371/journal.pcbi.1004497), 2015-09-09
Supplement: pcbi.1004497.s037.pdf [file pcbi.1004497.s037.pdf]

**S10 Table.** The enrichment analysis of the top 100 genes that have the highest gene average gravitation score between cancer gene census (CGC) and non-CGC.

| Cancer type | Number of CRF genes | Number of non-CRF genes | Adjusted p-value ( <i>q</i> ) | Odd ratio | Number of CRF genes | Number of all non-CRF genes |
|-------------|---------------------|-------------------------|-------------------------------|-----------|---------------------|-----------------------------|
| BRCA        | 9                   | 91                      | $4.5 \times 10^{-3}$          | 4.1       |                     |                             |
| COAD        | 8                   | 92                      | 0.01                          | 3.6       |                     |                             |
| GBM         | 9                   | 91                      | $4.5 \times 10^{-3}$          | 4.1       |                     |                             |
| HNSC        | 8                   | 92                      | 0.01                          | 3.6       |                     |                             |
| KIRC        | 9                   | 91                      | $4.5 \times 10^{-3}$          | 4.1       | 487                 | 19980                       |
| LUAD        | 6                   | 94                      | 0.03                          | 2.6       |                     |                             |
| LUSC        | 10                  | 90                      | $1.1 \times 10^{-3}$          | 4.6       |                     |                             |
| OV          | 8                   | 92                      | 0.01                          | 3.6       |                     |                             |
| UCEC        | 12                  | 88                      | $4.1 \times 10^{-5}$          | 5.7       |                     |                             |
