# Supplementary material for: A Gene Gravity Model for the Evolution of Cancer Genomes: A Study of 3,000 Cancer Genomes across 9 Cancer Types
Source: PubMed Central journal article supplement (PMC4564226; doi:10.1371/journal.pcbi.1004497), 2015-09-09
Supplement: pcbi.1004497.s038.pdf [file pcbi.1004497.s038.pdf]

**S11 Table.** The enrichment analysis of the top 100 genes that have the highest gene average gravitation score between chromatin regulation factors (CRFs) and non-CRFs.

| Cancer type | Number of CRF genes | Number of non-CRF genes | Adjusted p-value ( <i>q</i> ) | Odd ratio | Number of CRF genes | Number of all non-CRF genes |
|-------------|---------------------|-------------------------|-------------------------------|-----------|---------------------|-----------------------------|
| BRCA        | 6                   | 94                      | $1.6 \times 10^{-3}$          | 7.6       |                     |                             |
| COAD        | 3                   | 97                      | 0.12                          | 3.6       |                     |                             |
| GBM         | 4                   | 96                      | 0.04                          | 4.9       |                     |                             |
| HNSC        | 4                   | 96                      | 0.04                          | 4.9       |                     |                             |
| KIRC        | 7                   | 93                      | $2.3 \times 10^{-4}$          | 9.0       | 176                 | 20286                       |
| LUAD        | 7                   | 93                      | $2.3 \times 10^{-5}$          | 9.0       |                     |                             |
| LUSC        | 3                   | 97                      | 0.12                          | 3.6       |                     |                             |
| OV          | 6                   | 94                      | $1.6 \times 10^{-3}$          | 7.6       |                     |                             |
| UCEC        | 5                   | 95                      | $8.5 \times 10^{-3}$          | 6.2       |                     |                             |
