# Supplementary material for: A Gene Gravity Model for the Evolution of Cancer Genomes: A Study of 3,000 Cancer Genomes across 9 Cancer Types
Source: PubMed Central journal article supplement (PMC4564226; doi:10.1371/journal.pcbi.1004497), 2015-09-09
Supplement: pcbi.1004497.s039.pdf [file pcbi.1004497.s039.pdf]

**S12 Table.** The enrichment analysis of the top 100 genes that have the highest gene average gravitation score between DNA repair genes and non-DNA repair genes.

| Cancer type | Number of DNA repair genes | Number of non-DNA repair genes | Adjusted p-value ( <i>q</i> ) | Odd ratio | Number of all DNA repair genes | Number of all non-DNA repair genes |
|-------------|----------------------------|--------------------------------|-------------------------------|-----------|--------------------------------|------------------------------------|
| BRCA        | 2                          | 98                             | 1.0                           | 2.7       |                                |                                    |
| COAD        | 1                          | 99                             | 1.0                           | 1.3       |                                |                                    |
| GBM         | 3                          | 97                             | 0.32                          | 4.2       |                                |                                    |
| HNSC        | 4                          | 94                             | 0.06                          | 5.8       |                                |                                    |
| KIRC        | 2                          | 98                             | 1.0                           | 2.7       | 153                            | 20310                              |
| LUAD        | 2                          | 98                             | 1.0                           | 2.7       |                                |                                    |
| LUSC        | 1                          | 99                             | 1.0                           | 1.3       |                                |                                    |
| OV          | 2                          | 98                             | 1.0                           | 2.7       |                                |                                    |
| UCEC        | 1                          | 99                             | 1.0                           | 1.3       |                                |                                    |

Note: p-value in **S9-S12 Tables** was calculated using Fisher' exact test, and was corrected as adjusted p-values (*q*) by Benjamini-Hochberg multiple testing.
